# Supplementary material
Source: PubMed Central journal article supplement (PMC3070783)
Supplement: NIHMS275556-supplement-3.pdf [file NIHMS275556-supplement-3.pdf]

**Supplementary Table 3.** List of 114 genes differentially expressed between NM and SSM (P<0.05; Bonferroni correction for multiple tests). Negative fold change (FC) indicates lower expression in SSM relative to NM. NM-nodular melanoma, SSM- superficial spreading melanoma.

| Gene Symbol       | Probe ID    | Gene Bank | FC     | p-value  |
|-------------------|-------------|-----------|--------|----------|
| LOC283755         | 215847_at   | BC000975  | 9.03   | 0.000311 |
| MTAP              | 204956_at   | NM_002451 | -21.45 | 0.000313 |
| YDD19             | 37079_at    | U82319    | 3.18   | 0.000931 |
| EPB41L3           | 211776_s_at | BC006141  | -6.19  | 0.001039 |
| EEF1E1            | 204905_s_at | NM_004280 | 2.34   | 0.001091 |
| TAF9              | 203893_at   | NM_016283 | 1.67   | 0.001432 |
| FGFR1OP           | 205588_s_at | NM_007045 | 4.88   | 0.001522 |
| IFIT3             | 204747_at   | NM_001549 | 2.73   | 0.002046 |
| OXA1L             | 208717_at   | BC001669  | -1.46  | 0.00222  |
| LSM3              | 202209_at   | NM_014463 | 1.56   | 0.002543 |
| KPNA1             | 213741_s_at | BF575685  | 2.2    | 0.002597 |
| YDD19             | 215207_x_at | BF695847  | 2.93   | 0.002701 |
| C12orf29          | 213701_at   | AW299245  | -2.06  | 0.003951 |
| BNIP3             | 201849_at   | NM_004052 | -2.31  | 0.004794 |
| INSIG1            | 201625_s_at | BE300521  | 2.82   | 0.005464 |
| PPAN              | 221649_s_at | BC000535  | 2.08   | 0.005551 |
| C4orf16           | 219023_at   | NM_018569 | -1.32  | 0.005957 |
| EIF1AX            | 201016_at   | BE542684  | 2.4    | 0.006454 |
| PTP4A2            | 208616_s_at | U48297    | 1.74   | 0.00651  |
| MRPL11            | 219162_s_at | NM_016050 | 1.72   | 0.007538 |
| DDIT3             | 209383_at   | BC003637  | 4.09   | 0.0085   |
| C10orf97          | 218297_at   | NM_024948 | -1.76  | 0.008879 |
| GALNT7            | 218313_s_at | NM_017423 | 1.9    | 0.009096 |
| ELP3              | 221094_s_at | NM_018091 | 1.93   | 0.009346 |
| KCNAB2            | 211791_s_at | AF044253  | 3.03   | 0.009423 |
| PSMD12            | 202352_s_at | AI446530  | 1.73   | 0.009618 |
| SSX2IP            | 203019_x_at | NM_014021 | -2.36  | 0.009886 |
| DIMT1L            | 210802_s_at | BC002841  | 2.08   | 0.010165 |
| SMU1              | 218393_s_at | NM_018225 | 1.54   | 0.010279 |
| COMMD3            | 218048_at   | NM_012071 | -2.57  | 0.010438 |
| SEC23IP           | 209176_at   | AI332962  | -3.12  | 0.011794 |
| TEGT              | 200804_at   | NM_003217 | -1.61  | 0.011808 |
| RUVBL1            | 201614_s_at | NM_003707 | 1.49   | 0.012022 |
| ACADSB            | 205355_at   | NM_001609 | -2.55  | 0.012808 |
| PSMB2             | 200039_s_at | NM_002794 | 1.46   | 0.013164 |
| MRPS18B           | 208907_s_at | BC005373  | 1.78   | 0.013447 |
| SUMO3             | 200739_s_at | BG338532  | 1.5    | 0.013674 |
| RSRC1             | 219507_at   | NM_016625 | 1.74   | 0.013733 |
| POLR1C            | 209317_at   | AF008442  | 1.85   | 0.013822 |
| RNGTT             | 204207_s_at | AB012142  | 1.93   | 0.013878 |
| SEPT6             | 212414_s_at | D50918    | -3.28  | 0.01448  |
| SPIN2A /// SPIN2B | 211704_s_at | AF356353  | -2.09  | 0.015235 |
| TMED10            | 212352_s_at | BE780075  | -1.84  | 0.015697 |
| MRS2L             | 218538_s_at | NM_020662 | 1.82   | 0.015725 |
| EHD1              | 209039_x_at | AF001434  | 2.06   | 0.015903 |
| FAM45A /// FAM45B | 221804_s_at | BE565675  | -2.77  | 0.015921 |
| MYNN              | 218926_at   | NM_018657 | 1.57   | 0.015979 |
| MTAP              | 216685_s_at | AF216650  | -4.45  | 0.0162   |
| MARCH3            | 213256_at   | AW593996  | 2.32   | 0.016431 |
| NUP98             | 203194_s_at | AA527238  | 1.91   | 0.01659  |
| PRMT5             | 217786_at   | NM_006109 | 1.44   | 0.016969 |
| NAT13             | 217745_s_at | NM_025146 | 1.31   | 0.017046 |
| ANG               | 205141_at   | NM_001145 | -8.29  | 0.017799 |
| ZNF668            | 219047_s_at | NM_024706 | 1.58   | 0.018102 |
| G3BP2             | 208841_s_at | AB014560  | -2.32  | 0.01889  |
| U1SNRNPBP         | 205300_s_at | NM_022717 | -2.01  | 0.019251 |
| ATPBD1B           | 218799_at   | NM_018066 | 1.84   | 0.020047 |
| CHP               | 214665_s_at | AK000095  | -1.75  | 0.020621 |
| ZYX               | 215706_x_at | BC002323  | 1.34   | 0.021344 |

**Suppl. Table 3 Continued.**

|                    |             |           |        |          |
|--------------------|-------------|-----------|--------|----------|
| PHYH               | 203335_at   | NM_006214 | -3.38  | 0.021414 |
| ANXA6              | 200982_s_at | NM_001155 | -2.55  | 0.02244  |
| PPP2R2D            | 221772_s_at | AI138993  | -1.64  | 0.023009 |
| WDR57              | 215905_s_at | AL157420  | 1.73   | 0.023596 |
| ARHGEF2            | 207629_s_at | NM_004723 | 2.3    | 0.023618 |
| ZNF248             | 213269_at   | N21541    | -2.61  | 0.024746 |
| PTPN4              | 205171_at   | NM_002830 | -2.14  | 0.025707 |
| BDH2               | 218285_s_at | NM_020139 | -2.18  | 0.025738 |
| NAP1L1             | 208754_s_at | AL162068  | -3     | 0.026315 |
| TIA1               | 201449_at   | AL567227  | -2.09  | 0.027712 |
| N-PAC              | 222115_x_at | BC003693  | -2.67  | 0.028198 |
| ARIH1              | 201878_at   | N25546    | 1.61   | 0.028382 |
| HDAC3              | 216326_s_at | AF059650  | 1.29   | 0.029013 |
| GTSE1              | 204315_s_at | AI340239  | 2.76   | 0.030091 |
| Hs.105751.0        | 206874_s_at | AL138761  | -2.42  | 0.030413 |
| RUNDC3B            | 215321_at   | AI825798  | 2.49   | 0.031176 |
| FLJ11506           | 202852_s_at | NM_024666 | 1.29   | 0.031482 |
| SEPT6              | 212413_at   | D50918    | -3.52  | 0.03155  |
| ALDH7A1            | 213591_at   | AU149534  | -17.96 | 0.03159  |
| FAM134A            | 222129_at   | AK026155  | -1.89  | 0.032928 |
| DIS3               | 214194_at   | AW043622  | -2.22  | 0.032932 |
| GATAD1             | 213018_at   | AI337901  | -1.48  | 0.034109 |
| ZNF764             | 222120_at   | BC000016  | 1.41   | 0.034812 |
| SKIP               | 202781_s_at | AI806031  | -1.98  | 0.035111 |
| NUDC               | 210574_s_at | AF241788  | 1.57   | 0.036201 |
| MAGEH1             | 218573_at   | NM_014061 | -4.05  | 0.036314 |
| NOL11              | 221970_s_at | AU158148  | 1.6    | 0.036928 |
| ZYX                | 200808_s_at | NM_003461 | 1.74   | 0.036994 |
| ZBTB17             | 203602_s_at | NM_003443 | 1.27   | 0.037306 |
| RBM13              | 211686_s_at | AF251062  | 1.74   | 0.037542 |
| GNS                | 212334_at   | BE880245  | -2.14  | 0.037824 |
| PPAT               | 209433_s_at | AI457120  | 2.11   | 0.038043 |
| USO1               | 201831_s_at | BE875592  | -1.57  | 0.038219 |
| GTF2A2             | 202678_at   | NM_004492 | 1.48   | 0.038235 |
| GALE               | 202528_at   | NM_000403 | 1.9    | 0.038323 |
| UBXD8              | 212108_at   | AB020694  | 1.42   | 0.038398 |
| DCUN1D4            | 212855_at   | D87466    | -1.34  | 0.038955 |
| TRIM38             | 203567_s_at | AU157590  | 1.85   | 0.039263 |
| cDNA FLJ40810 fis  | 217922_at   | AL157902  | -1.5   | 0.039738 |
| KCTD5              | 218474_s_at | NM_018992 | 1.91   | 0.039891 |
| SR140              | 212058_at   | AI184562  | 2.07   | 0.040738 |
| SNN                | 218032_at   | AF070673  | -1.84  | 0.040979 |
| DDX3Y              | 205001_s_at | AF000985  | 8.43   | 0.041104 |
| TYRO3              | 211431_s_at | D50479    | -1.58  | 0.042083 |
| GFPT1              | 202722_s_at | NM_002056 | 1.51   | 0.04335  |
| LIN7C              | 221568_s_at | AF090900  | 1.38   | 0.043555 |
| MED14              | 202610_s_at | AF135802  | 1.48   | 0.043721 |
| clone CS0DB003YD12 | 217721_at   | BE551361  | -2.97  | 0.043727 |
| DHFR               | 202533_s_at | BC003584  | 2.44   | 0.04377  |
| ARL6IP4            | 218216_x_at | NM_016638 | -1.75  | 0.043802 |
| DHX16              | 203694_s_at | NM_003587 | 1.49   | 0.044262 |
| cDNA clone YR67C11 | 216101_at   | AL049242  | 1.75   | 0.045547 |
| SLC39A8            | 209267_s_at | AB040120  | -1.81  | 0.046411 |
| CNBP               | 206158_s_at | NM_003418 | 1.23   | 0.046828 |
| SLC4A4             | 203908_at   | NM_003759 | 1.77   | 0.047376 |
| C5orf4             | 220751_s_at | NM_016348 | -9.63  | 0.048167 |
| KIAA0406           | 212898_at   | AB007866  | -1.24  | 0.048189 |
